# Supplementary material
Source: PubMed Central journal article supplement (PMC3548851)
Supplement: psb-7-1373-s01.pdf [file psb-7-1373-s01.pdf]

## **Supplemental Material to:**

**Mark Kwaaitaal, Jens Maintz, Meltem Cavdar and Ralph Panstruga**

**On the ligand binding profile and desensitization of plant ionotropic glutamate receptor (iGluR)-like channels functioning in MAMP-triggered Ca<sup>2+</sup> influx**

**Plant Signaling & Behavior 2012; 7(11)**

**<http://dx.doi.org/10.4161/psb.21761>**

**<http://www.landesbioscience.com/journals/psb/article/21761>**

## Supplemental Figure 1. Transmembrane and CaMBD predictions for individual Arabidopsis iGluRs.

### Transmembrane (TM) domain prediction:

<http://aramemnon.botanik.uni-koeln.de>. Data shown are the results of TmHMM\_v2 (Hidden Markov Model prediction of TM), which are representative for the majority of the prediction tools.

### Calmodulin binding domain prediction:

<http://calcium.uhnres.utoronto.ca/ctdb/ctdb/home.html>

### Color coding of the predicted TM domains:

- IQTPILLSFLLVLLFFISNCF:** predicted TM domain at the extreme N-terminus of the N-terminal extracellular domain
- KSLWLASGAFFVLTGIVVWLV:** TM1, predicted TM domain that overlaps with the published first TM domain of iGluRs.
- SWGQQLSMMLWFGFSTIVF:** TM2, predicted TM domain that represents and overlaps with the iGluR ion pore domain.
- RFLVIVVVFVVLILTSSYSAN:** TM3, predicted TM domain that overlaps with published second TM domain of iGluRs.
- RGLFIAGAAHVLLALHLFH:** TM4, predicted TM domain that overlaps with published third TM domain of iGluRs.
- ELWFLTAASFLYIGIMSUTA:** No TM1 predicted in GLR2.6 using TmHMM\_v2; instead TmConsens used to assign most N-terminal TM domain and start point CaMBD predictions

### Coding of CaMBD predictions:

- GLR1.1 (last 268 AA):** GLR family member plus (in brackets) amino acids (AA) taken for CaMBD prediction
- TSTKTISRMLNHQ:** Amino acids included in CaMBD prediction
- AHREKLQKMSS:** Predicted CaMBD. Red values have a score of 9, orange values have scores from 6 to 8.

### GLR1.1 (last 268 AA)

MEILFSISILALLFSGVVAAPSDDDVFEEVRVGLVVDLSSIQGKILETSFNLALSDFYGINNGYRTRVSVLVRDSQGDPIIALAAA  
TDLLKNAKAEAIVGAQSLQEAKLLATISEKAKVPVISTFLPNTLSLKKYDNFIQWTHDTTSEAKGITSLIQDFCKSVVVIYEDA  
DDWSESLQILVENFQDKGIYIARSASFVSSSGENHMMNQLRKLKVSRSVVFVHMSEILVSRFLQCVEKLGLEEFDAWI

LTARTMNYLEHFAITRSMQGVIGFSYIPVSEEVKNFTSRLRKRMGDDTETEHSVVIIGLRAHDACILANAVEKFSVSGKVEA  
SSNVSADLLDTRHSRFGKLSGDIQISDNKFISETFIEVNIIGREKQRRIGLWSSGFSQRRQIVWPGRSRKIPRHRVLAKEGK  
KVLRLVLTAGNKVPHLVSVRPDPETGVNTVSGFCVEVFKTCIAPFNYELEFIPYRGNNDNLAYLLSTQRDKYDAVGDITITS  
NRSLYVDFTLPYTDIGILTVKKKSQGMWTFDFPEKSLWLASGAFFVLTGIVVWLVERSVPNEFQGSWGQQLSMMLWF  
GFSTIVAHREKLQKMSSRFLVIVVVFVVLITSSYSANLTSTKTISRMQLNHQMVFGGSTTSMTAKLGSINAVEAYAQLLR  
DGTLNHVINEIPYLSILIGNYPNDFVMTDRVTNTNGFGFMFQKGSIDLVPKVSREIAKLRSLGMLKDMKKEKWFQKLDLSNVH  
SNTEEVASTNDDDEASKRFTFRELRGLFIAGAAHVVLVLAHLHFTRQEVSRCTKLQSFYK

**GLR1.2 (last 308 AA)**

MVRICIQTPILLSFLLVLLFFISNCFASSQNNDDDKRIRVRVGLVLDLGSVEGKIVRSSVSMALSDFYDNHNDYKTRLSLLVRDS  
HGEPLALDSVVDLLQTEGVQAIIGGNSLLEAKLLAELGEKARVPVISLNSPMSLSLSKYTHLIQATHNSASEVKITAFHGF  
WNSVALVLEDHDDWRESMHFMVDHFNHNVHVQSKVAFSVTSSDSLMDRLRELKDLGTTVFVHLSEVIATRLFP  
KLGMMGEGFAWILTSRSMSSFHDQFIDDLTKEAMEGVVGFKSYIPMSKELHNFTLRWRKTLPEVEVTGSEITRLSISGVWA  
HDVAWSLASAAEVTRMPTVTSTLLEAIKESRFGKLSGNFQLDDMKLLSDKFEIVNMIGSGERRVGFVNSNGSFSNRRQLSS  
THDNLETIIWPGGSAQSPKGRSLRESGRKKLRVLTSSNRFPRMLKVETDPITHEITIVEGFCIEVFQASIAPFNVEYIRWLN  
GTNYTKLAYALHSQKDKYDAVGDITITSDRSMYVDFLTPYTEMGLGIVAAKERSMWWFFQPLTPNLWITSAFFVLTGIV  
WLI ERAENKEFGSWPQQIGVVIWFGFSTLVYAHREKLQHNLSRFVTVWVFAVLILVTSYATLTSMMTVQQIRFNANE  
DYVGHLSGLIANAALTNSSLRAMRLGLNTSEDYAQALMNKSVSYIVSELPYLKILLGENPGHFLMVKTQSTTNGFGFMFQ  
KGSELAPNVSREIAKLRTERLNEMERRWFDKQLPYTTDDTSNPITLYRFRGLFMITGVSFAFALAVLILWLRERWEILVNSV  
NIYFSQRLRHFRILFTRTIHPSPLGLDNPIGENAVQMAQRNR

**GLR1.3 (last 304 AA)**

MERFCIQTQLLSFLLVLLLFISRSFASTKNDDVDGGKRVQIRVGLVLDLGSGLKGVKNSVSMALSYFYAIHNDYKTRVSVSLR  
NSHGEPLALASAVDLLKTEGVEAIIGGNSLLEAKLLGELGEKARVPMISLDSPLSLSKYTHLIQATHDSTSEAKGITSFINV  
DWNSVALVYEDHDDWRESMQLLVEHFHENGVRVQSKVGFTVSSSEDFVMGRLQQLKDLGTTVFVHLSEVIATHLFP  
RRLGLMGDGFVWILTAKTMNSFHENIDDFTKQAMEGVVGFKSYIPMSIELQNFTRWRKSLPVEEAELTRLSISGIWAHDI  
AFALARAAEVIRMPNVTSTLLEEITKTRFNGLSGDFQLNDKLLSNKFEIINMIGSSERRVGFVNSNGSFSNRRHLSSTHNKLE  
TIIWPGGSAQSPKGTSLIDSRKKLRVLTSSNRFPRMLKVETDPVTNELIVEGFCIEVFRASISPFNVEYIYVWLNGSNYDN  
LAYALHSQKDKYDAVGDITITSNRSTYVDFLTPFTEMGLGIVAVKERSMWWFFQPLTPDLWITSAFFVLTGIVWLI ERAE  
NKEFGSWPQQIGVVLWFGFSTLVYAHREKLKHNLSRFVTVWVFAVLILTASYATLTSMMTVQQIRFNSNEDYVGHLS  
GSLIANVALTSSSLRAMRSLGLNSAADYAQALLNKTVSFVDELPLYLVVGENPHTFFMVKTQSTTNGFGFMFQKGFELV  
PNVSREISKLRTEKLNEMEKRWFDNQLPYTTDDTSNPITLYRFRGLFIIIGVSFAFALAVLILC LRDKWEILVDNLDLSQRLR  
HFRIHFVRSIHTSPLDDPIGETAVQMAQQNRQ

**GLR1.4 (last 294 AA)**

MENCMIRNTGYFLTIFFLAFISFAVTCSGTNQKDNVDRLPVVYEDVRIGLVVDMGSMGKLVTTSSISMALSDFYHVNNGYR  
TRVSVLSRDSHGDPQLALAAAMDLLQTEQVEALVGGQSLLEAKNLAELGEKTKVPVISSFQVPSSLSLAKYNYFIQATHDTS  
EAKGIAALFSNFDWRTAVLIYEDDDWRESIQPLVGHFQQNAIHIEYKAEFSVSSNEECIMKQLRKFASGIRIFVAHISERIA  
NRLFPCCARRLGMMEEGYAWILTARSMNNFQDTNYLAKEEMEGVIGFSYIPLTEELHNFTLRWRKSLRLEEVTRMSVCSI  
WAHDIASLARAEEVAKLPGLSVYDLLEAIPESAKHKGSLGDIKFKFISDKFEIVNMIGRGERSVGLWNSGFSISNRRRR  
LSSTKALETIIWPGGSTRIKIRSLKEKRHGKKKLRVLPAGNITPQILEVKTDFKTGVTAAATGYCIDVFETSILPFNVEYIYVW  
PGAINYKNYNDLVYTLYSQKDKYDAVGDITITDNRSYVDFLTPFDMGLAVVTAKDKSMWIIFKPLTSLWLTIASFILTG

AIVWLIERHDNADFQGSSCFQQIGTLLCFGFSTLVFAHRERLQHNMSRFVVIVWIFAVLILTSNYTATLTSVMTVQQIRGLKS  
NENIGFFSASIAANVVNDNPTFQGPRYKGLKTADDFTNALRNGTISFIVDEVPPYVKLFVAKHPSEFVIVETESVTNGFGFAFO  
KGSPLVQKVSREIEKLRREKLAIENWWFQRQTTSATSEDTFHPLTVYTFRGLFMITGVSFAFALIVYLPWNREQRQVVLK  
HFHRYVSHRFAREIRPSPPTPNRQENSVI

**GLR2.1 (last 328 AA)**

MKRENNLVLSLLFFVIVFLMQVGEAQNRRITNVNVGIVNDIGTAYSNMTLLCINMSLSDFYSSHPETQTRLVTTVVDSKNDV  
VTAAAAALDITNKEVKAILGPWTSMQAQFMIEMGQKSQVPIVYSATSPSLASIRSQYFFRATYDDSSQVHAIKEIKLFGW  
REVAPVYVDDTFGEGIMPRLTDVLQEIINVRIPIYRTVISPATDDEISVELLRMMTLPTRVFVHVELLASRFFAKATEIGLM  
KQGYVWILTNTITDVLSIMNETEIMQGVLGKTYVPRSKELENFRSRWTKRFPISDLNVYGLWAYDATTALALAEIAGTS  
NLTFVKMDAKRNVSELQGLGVSQYGPKLLQTLRVRVQGLAGDFQFINGELQPSVFEIVNVNGQGRTIGFWMKEYGLFK  
NVDQKPASKTTFSSWQDRLRPIIWPGDTTSPVKGWEIPTNGKRLQIGVPVNTTFQFVKATRDPITNSTIFSGFSIDYFEAVI  
QAIPYDISYDFIPFDGGYDALVYQVYLKGYDAVVADTTISSNRSMYVDFSLPYTPSGVGLVVPKDSVRRSSTIFLMPLTLAL  
WLISLSSFFIIGLVVWVLEHRVNPFDGPGQYQLSTIFWFSFSIMVFAPRERVLSFWARVVVVIWYFLVLVLTQSYTASLASLL  
TTQHLHPTVTNINSLLAKGESVGYQSSFILGRLRDSGFSEASLSVYSGSPEHCDALLSKGQAEAGGVSAVLMEVPYVRIFLGGYC  
NKYKMQVTPFKVDGLGFVPIGSPLVADISRAILKVEESNKANQLENAWFKPIDESCPDPLTNPDPNPSVSFRQLGDFSFWV  
FLVAAIVCTMALLKFVYQFLKENPNQRNLRVLWEKFNEDQKSYIKDVTCKQCSSGQGMPPKNGQEGANAVNNGN

**GLR2.2 (last 341 AA)**

MKNSKLFFRFLFLFFFCLSSRGQDNGKTQVNIGVSDVGTSPDVAMLCINMSLADFYSSRPQFQTRLVVNVGDSKNDV  
VGAATAADLIKNKQVKAILGPWTSMQAHFLEIGQKSRVPVVSYSATSPSLTSLRSPYFFRATYEDSSQVHAIKAIKLFGW  
EVVPVYIDNTFGEGIMPRLTDSLQDINVRIPYRSVIPLNATDQDISVELLKMMPTRVFIVHMSSSLASTVFIKAKELGLMK  
PGYVWILTNGVMDGLRSINETGIEAMEGLGIKTYIPKSKDLETFRSRWKRFPQMELNVYGLWAYDATTALAMAIEDAGI  
NNMTFSNVDTGKNVSELDGLLSQFGPKLLQTVSTVQFKLAGDFHFVSGQLQPSVFEIVNMIGTGERSIGFWTEGNGLV  
KKLDQEPSIGTLSTWPDHLKHIIWPGEAVSPVKGWEIPTNGKLRIGVPRKIGFTDLVKVTRDPITNSTVVKGFCIDFFEAVI  
QAMPYDVSYEFPFEKPNGEAGNHNDLVHQVYLGQFADAVVGDTTILANRSSFVDFTLPMFKSGVGLIVPLKDEVRDKFS  
FLKPLSIELWLTTLVFFLVGISVWTLEHRVNSDFRGPANYQASTIFWFAFSTMVFAPRERVLSFGARSLVVTWYFVLLVLTQ  
SYTASLASLLTSQQLNPTITSMSSLLHRGETVGYQRTSFILGKLNKNETGFPQSSLPFDTAEECDLLKKGPKNGGVA AFLGTP  
YVRLFLGQYCNTYKMWEEPFNVDFGFGVFPISPLVADVSRAILKVAESPKAVELEHAWFKKKEQSCPDPVTNPDNPTVT  
AIQLGVGSFWFLFLVVFVYCVLALGKFTYQFLWKTGKDLWKEFLKRDTSYINDIEKCLCSQEMPENSNAKATNQTNYGME  
LRVRNIVQVNQTDPDCL

**GLR2.3 (last 316 AA)**

MRTEKLFFCILLVFFFCLFNRGQNGKTLVDVGVVTDVDTSHSKVVMCINMSISDFYSSNPQFETRLVVNVGDSKSDV  
GAAIAALDLIKNKQVKAILGPWTSMQAHFLEIGQKSRVPIVYSATSPILTSLRSPYFLRATYEDSFQVQPIKAIKLFGWREV  
PVYIDNTFGEGIMPRLTDALQDINVRIPYRSVIANATDHEISVELLKMMPTRVFLVHMYDLASRFFIKAKELGLMEPGY  
VWILTNGVIDDLSLINETAVEAMEGLGIKTYIPKSPDLEKFRSRWRSLFPRVELSVYGLWAYDATTALAVAIEEAGTNNMTF  
SKVVDTRNVSELEALGLSQFGPKLLQTLTVQFRGLAGEFRFRGQLQPSVFEIVNIINTGEKSIGFWKEGNGLVKKLDQQA  
SSISALSTWKDHLKHIVWPGEADSVKGWQIPTKGGKLRIGVPRKRTGYTDLVKVTRDPITNSTVVTGFCIDFFEAVIRELPYD  
VSYEFIPFEKPDGKTAGNYNDLVYQVYLGRYDAVVGDTTILVNRSSYVDFTFPFKSGVGLIVEMTDPVKRDYILFMKPLSWK  
LWLTSFISFFLVGCTVWVLEYKRNPDFSPPRFQASTICWFAFSTMVFAPRERVFSEWARALVIAWYFLVLVLTQSYTASLAS  
LLTSQQLNPTITSMSSLLEKGETTVGYQRTSFILGKLERGFPQSSLPFDTAEECDLLSKGPKKGGVSGAFLEIPYLRFLGQFC

NTYKMVEEPFNVDGFGVFPIGSPLVADVSRAILKVAESPKAMELERAWFKKKEQSCDPITNPDNPSFTSRQLDIDSF **FL**  
**FVGVLLVCMALGNFTYC**FLAKDQVSYLDKIVEMSPCSSSQMPVKKRKTQLNMSQVHDQDSL

**GLR2.4 (last 317 AA)**

MSSKYFQDVYIPRYLTKTKNKRKMKRHLNDVVLVFLVFIFGVKLGKQNTTIQVINVGWVTDVGTASNLSSLAINMSLSDF  
YSSRPESRTRLLNFADSRDDVVGAAAAALDIKNKEVKAILGPRTTMQASFVIEVGQKSQVPIISFSATSPFLDSGRSPYFFRS  
TYDSSQVQAISEIIVFGWREVPVYENNAFGEIMPGLTDALQAINIRIPYRTVISPNATDDEISVDLLKMTKPTRVFWVH  
MNRFLASRVFSKARETGLMKQGYAWILTNGVIDHLVLMNGTDIEAMQGVIGIRTHFPISEELQTFRSRLAKAFPVSELNIYG  
LRAYDATTALAMAVEEAGTTNLTSKMDGRNISDLEALSVEYGPKLIRLSLQIQFKGLSGDYHFVDGQLHASVFEIVNVIDG  
GGILVGFWTQDKGLVKDLSPTSSGTRTFSSWKNHNLNLPILWPGITLTPVKGWEIPTNGKELQIGVPVGTFPQFVKVTTDPLTH  
ETIVTGFCDFFEAVIQAMPYDVSHRFIPFGDDGKNTDTILANRSSYVDFTLPTTSGVGMVVPLKDNVARSSLIFFKPLT**P**  
**GLWGMTLGSFFVVGFWVWIL**EHRVNSEFTGP**PQYQISTMFWFAFSIMVFAPR**ERVMSFTARVVVITCLSSLLTTQQLNPTE  
TSIKNLVAKGG**PVAYQRDSFVLGKLR**ESGFPEPRLVPFTSPEKCELLNKGPSKGGVSAAFMEVPYVRVFLGQYCKKYKME  
VPFDVDGFGFVFPISPLVADV**SRAILKVAESNKATQ**LETAWFKNIDKTCDPDMNPNPDNPTVSFRKLSLDSFLL**LFVAAA**  
**VCTLALLKVFVGL****QNRILNDEFYRG**KRMKEMWLKFMESDGESYISRVSTCPQVLIQPREEDIDPING

**GLR2.5 (last 317 AA)**

MASRQGLSSTSETPNKLVLPLQKREVVAIIGPGTSMQAPFLINLGNQSKVPIISFSATSPLDSLRSFYFIRATHDDSSQVQA  
ISAIIESFRWREVPVIYVDNEFEGEILPNLVDAFQEINVRIRYSAISLHYSDDQIKKELYKMTMPTRVFIVHMLPDLGSRFSI  
AKEIDMLSKGYVWIVTNGIADLMSIMGESSLVNMHGVLGVKTYFAKSKELLHLEARWQKRFGEELNNFACWAYDAATA  
LAMSVEEIRHVNMFSNTTKEDTSRDDIGTDLDELGVALSQPKLLDALSTVSFKGVAGRFQKNGKLEATTFKIINIEESGERTV  
GFWKSKVGLVKSLRVDKVSSSHRRLRPIIWPGDITFVPGKWEFPTNAKKLRIAVPKKDFNMFVEVTKDENTNVPVTGFCI  
DVFNTVMSQMPYAVSYEYIPFDTPDGKPRGSYDEMVERNVLGEFDGAVGDTTILANRSHYVDFALPYSETGIVFLVPVKDG  
KEKGEVWFLKPLTKE**LWLTAASFLYIGIMVWIFEY**QADEEFREQMIIDKISSVFYFSFSTLFFA**HRRP**SESE**FTRVLVVVWCF**  
**VLLILTQSYT**ATLTSMLTVQELRPTVRHMDDLKSGVNIQYQTSFTFERLKQMRFDESRLKTYNSPEEMRELFHKSSNGGI  
DAAFDEVAYIKLFMAKYCSEYSIIPTFKADGFGFAPLGSPLVSDISRQILNITEGDAMKAIENKWFGEKHCLDSTTSDSPIQ  
LDHHSFEA**FLVVFVSVILLMLASRG**YQERQHNASPNLNDQANAAQEEVNEEGNVGDHIVEVDTALAKVSIVKPKL

**GLR2.6 (last 317 AA)**

MSLFNHLLSRALPLWLLFFINFLVLLGKSQQEVLQVQVGVLDTNATLAALSLRAINMSLSEFYNTNGFKTRIVLNIRDSKRT  
VVGAAASALYLIKKREVVAIIGPGNSMQAPFLINLGNQSQVPIISFSASSPVLDSLRSFYFIRATHDDSSQVHAISAIIESFRWR  
EVPYIADNEFEGEILPYLVDAFQEINVRIRYSAISVHSTDDLKELYKMTMPTRVFIVHMLPDLGSRFSIAKEIGMMTK  
GYVWIVTNGIADQMSVMGESSLENMHGVLGVKTYFSRSKELMYLETRWRKRFGEELNNFECWGYDTATALAMSIEEIS  
SNVNSMFSQTKRNTSRDDTGTDLDDLSFALSGPKLLQALATVSFKGVAGRFQKNGKLEATTFKIVNIEESGERTVGFWKS  
VGLVKSLRVNQTGKISHSSHRLRPIIWPGDITFVPGKWEFPTNAKKLRIAVPKKDFNMFVEVTKDANTNAPTITGFCIDVF  
DTAMRQMPYAVPYEYIPFETPDGKPRGSYDEMVERNVLGEFDGAVGDTTILANRSTYVDFALPYSETGIVVVVVPVKDEREK  
GKWWFLKPLTRE**LWFLTAASFLYIGIMSATL**TSMMLTVQELRPTVRHMDDLNSGVNIQYQTSFTFERLKQMGYKESRLK  
TYDTPQEMHELFLKSSNGGIDAAFDEVAYVVKLFMAKYCSKYTIIPTFKADGFGFAPLGSPLVPLDSRQILNITEGETMKAI  
ENKWLLEKHXCLDSTTSDSPIRLDHSF**EALFTIVFVSM****LUJLAMILVGR****RRYRQESKSGE**INANNSPDGNMRAPPNQPTD  
DNMRAPTSPIDDQVLEPPGALNEADDQDQLLNDEVNVGDRNEVDIIVEVDPTLVHRRNLITSKTIPTRAALFSRIKSA

**GLR2.7 (last 371 AA)**

MKVMNPRKTNNTFMYYFVLFVCGFVLMEGCLGQNQTTEIKVGVVLDLHTSFSKLCLTSINISLSDFYKYHSDYTTRLAIHIRD  
SMEDVVQASSAALDLIKNEQVSAIIGPRTSMQAEFMIRLADKSQVPTITFSATCPLLSINSPIYFVRATLDDSSQVKAIAAIVK  
SFGWRNVVAIYVDNEFEGEGILPLLDALQDVQAFVVRNCLIPQEANDDQILKELYKLMTRVVFVHMPPTLGRFFQK  
AREIGMMEEGYVWLLTDGVMNLLKSNERGSSLENMQGVLGVRSHIPKSKKLNFRWRWEKMFPPKGNDEEMNIFALRAY  
DSITALAMAVEKTNIKSLRYDHPIASGNKNTLGLTGVSRYPGSLKALSNVRFNGLAGEFELINGQLESSVFDVINIIGSEERII  
GLWRPSNGIVNAKSKNTTSVLGERLGPVIWPGKSKDVPKGWQIPTNGKMLRVGIPVKKGFLEFVDAKIDPISNAMTPTGY  
CIEFEAVLKKLPYSVIPKYIAFLSPDENYDEMYYQVYTGAYDAVVGDVIVANRSLYVDFTLPYTESGVSMMPVPLKDNKNT  
WVFLRPWSLDLWVTACFFVFIGFIVWLEHRVNTDFRGPPHHQIGTSFWFAFSTMNFAHREKVVSNLARFVVVWCFVV  
VLIQSYTANLTSFFTVKLLQPTVTNWKDLKFNKNIGYQRGTFVRELLKSQGFDESQKPFGSAVECEDELFSNGTITASFDEV  
AYIKVILSQNSSKYTMVEPSFKTAGFGFVFPKKSPLTDDVSRILNVTQGEEMQHIENKWFKPNPCDPLNTSLSSNHLSSS  
FWGLFIAGIASFLALLIFVANFLYEHKHTLFDSENSFRGKLFVRNFDEKDIKSHMFKENAVHNVSSPITQGSSSPLTDQS  
TPLPRPEQYRELELRRVSSISSGELFTTQSEQVEDEESAIQCEGE

**GLR2.8 (last 371 AA)**

MNPKNNTFLSYFVCLFLLLEVGLGQNQISEIKVGVVLDLNTTFSKICLTSINLALSDFYKDHHPNYRRLALHVRDSMKDTV  
QASAAALDLIQNEQVSAIIGPIDSMQAKFMIKLANKTQVPTISFSATSPLLTSIKSDYFVRGTIDDSYQVKAIAAIFESFGWRSV  
VAIYVDNELGEGIMPYLFDALQDVQVDRSVIPSEANDDQILKELYKLMTRQTRVVFVHMASRLASRIFEKATEIGMMEEGY  
VWLMTNGMTHMMRHHGRSLNTIDGVLGVRSHVPKSKGLEDLFRWRKRNFKKNPWLRDDLSIFGLWAYDSTTALA  
MAVEKTNISSFPYNNASGSSNMMDLGLTHVSRYPGSLLEALSEIRFNGLAGRFNLIDRQLESKFEIIFVGNNEERIVGFWT  
PSNGLVNVNSNKTTSFTGERFGPLIWPVKSTIVPKGWEIPTNGKKIKVGVVPPKGFNFVEVITDIPITNITPKGYAIDIFEAL  
KKLPYSVIPQYRFESPDDDYDDLKYVDNGTLDVAVVGDVITAYRSLYADFTLPYTESGVSMMPVRDNENKNTWVFLKP  
WGLDLWVTACFFVLIGFVWLEHRVNTDFRGPPHHQIGTSFWFSFSTMVFAHREKVVSNLARFVVVWCFVVLVLTQ  
SYTANLTSFLTQRFQPAAINVKDLIKNGDYVGYQHGAFAVKDFLIKEGFNVSKLKPFGSSEECHALLSNGSISAAFEDEVAYLRA  
ILSQYCSKYAIVEPTFKTAGFGFAPRNSPLTGDVSKAILNVTQGDDEMHIENKWFMKQNDPCDPKALSSNRLSRSFWG  
LFIAGIASFLALLIFVFLFLYENRHTLDCDSEDSIWRKLTSLFRNFDEKDIKSHTFKSSAVHHVSSPMTQYIPSPSTLQIAPRPHS  
PSQDRAFELRRVSFTPNEERLTTQTIHFEDEESDIECVVEQ

**GLR2.9 (last 375 AA)**

MKTNNTFLSYFVCGFLLMGVGLGQNTSEIKVGVVLDLNTTFSKICLTSIKMAVSDFYADHPNYLRLTLHVRDSMEDTVQ  
ASAAALDLIKTEQVSAIIGPINSMQADFMIKLANKTQVPTITFSATSPLLTSIKSPYFVRATIDSSQVRAIASIFKFFRWRRVVA  
IYVDNEFEGEGFMPFLFDALQDVEVKRSVIPPEAIDDEIQKELRKLMEQARVVFVHMESSLALRVFQIARDIGMMEEGYVW  
LMTNGMTHMMRHINNGRSLNTIEGVLGVRSHVPKSKELGDFRWRKRTEKENPSMRDDLNVFALWAYDSITALAKAVE  
KANTKSLWYDNGSTLSKNRTDLGNVGVSLYGPQLKAFSEVRFNGLAGEFKLIDGQLQSPKFEIIFVGNNEERIIIGFWTPRD  
GLMDATSSNKKTLGPVIWPGKSKIVPKGWEIPGKLRVGVPMKKGFDFVVKVTINPITNKKTPTGYAIEFEAALKELPYLVIP  
EYVSFESPNNYNNLVYQVYDKTWDVAVGDITITANRSLYADFTLPFTESGVSMMPVRDNENKDTWVFLPEWSLELWVT  
TGCFVFIGFVWLEHRVNTDFRGPPQYQIGTSLWFSFSTMVFAHRENVVSNLARFVVVWCFVVLVLTQSYTASLTSFL  
TVQSLQPTVTNVNDLIKNRDCVGYQGGAFVKDILLGLGFHEDQLKPFDSAADDLLSKGKSKGIAAAFDEVAYLKAILSQS  
CSKYVMVEPTFKTGGFGFAPKNSPLTGEFSRILNLTQNNVTQQIEDRWFPKKNDCPDPMALSSNRLNLSFGLFIAG  
TAISFSLVFAFLYEHRTLGDSEDSLWRKLFKFLKIFDEKDMNSHTFKNSAIHNISSPMTHKTPSPSTVQITPWPOSPSQ  
NREFELRRVSFSPSEERFTTQPIIHHEDGESDIECRVEQ

**GLR3.1 (last 335 AA)**

MSFPTFSFHFSKVSCLFLKQLLLYGFFFSMNWVLLSFIIVLGGGLLSEGASSRPPVIKVGAIFFLNTMYGETANIAFKAAEE  
DVNSDPSFLGGSKLRILMNDAKRSGFLSIMGALQFMETDVVAIIGPQTSIMAHVLSHLANELTVPMLSFTALDPTLSPLQFP  
FFVQTAPSDFLMRAIAEMITYYGWSDVVALYNDNDDNSRNGVTALGDELEERRCKISYKAVLPLDVVITSPVEIIEELIKIRGM  
ESRIVVNTFPNTGKMIFKFEAERLGMMEKGYVWIATTWLVSSVLDNLPLDTKLVNGVLTLRHTPDRSRKKRDFARWKN  
KLSNNKTIGLNVYGLYAYDTVWIIARAVKTLLEAGGNLSFSNDAKGLSKGEALNLSALSFRDQGSQLLDYIVHTKMSGLTGP  
VQFHPDRSMLQPSYDIINLVDDRHHQIGYWSNYSGLSIVPPESFYKPPNRSSSNQHLNSVTWPGGTSVTPRGWIFRNG  
RRLRIGVPDRASFDFVSRVNGSSNKVQGYCIDVFEAAVKLLSYVPPHEFIFFGDGLTNPYNELVNKVTTGVDFDAVVDI  
AIVTKRTRIVDFTQPYIESGLVVVAVPTRLNENPWAFLRPF **TLPMWAVTASFFVIVGAAIW**LEHRINDEFGRPPRRQIITLW  
FTFSTMFFSHRETTVSTLGRMVL **LIWLFVVLIISSYASLTS**LTVQQLNSPIKGVDTLISSTGRIGFQVGSFAENYMTDELNIA  
SSRLVPLASPEEYANALQNGTVAAIVDERPYIDLFLSDYCK **FAIRGQEFTRCGWGFAFP**RDSPLAVDMSTAILGLSETGELQKI  
HDRWLSKSNCSPPHGSQSGDSEQLNVH **SFWGMFLVVGIACLVALFIH**FKIIRDFCKDTPEVVVEEAIPSPKSSRLTKLQTL  
AFVDEKEEETKRRLKRKRNDHSMNANSIISRTASRRP

**GLR3.2 (last 324 AA)**

MFVVLVLLSFIVLIGDGMISEGAGLRPRYVDVGAIFSLGTLQGEVTNIAMKAAEEDVNSDPSFLGGSKLRITTYDAKRNGFLT  
IMGALQFMETDAVAIIGPQTSIMAHVLSHLANELSVPMLSFTALDPSLSALQFPFFVQTAPSDFLMRAIAEMISYYGWSEV  
IALYNDNDDNSRNGITALGDELEGRRCKISYKAVLPLDVVITSPREIINELVKIQGMESRVIIVNTFPKTKKIFEEAQKLGMMEK  
GYVWIATTWLTSLLDVSNPLPAKTAESLRGVLTRIHPTNSKKKDFVARWNKLSNGTVGLNVYGLYAYDTVWIIARAVKRL  
LDSRANISFSSDPKLTSMKGGGSLNLGALSIFDQGSQFLDYIVNTNMTGVTGQIQFLPDRSMIQPSYDIINVVDDGFRQIGY  
WSNHGSLIIPPEPLYKLSNRSSSNQHLNNVTWPGGTSETPRGWVFPNNGRRLRIGVPDRASFKEFVSRLDGSKNVQGYA  
IDVFEAAVKLISYVPPHEFLVFGDGLKNPNFNEFVNNVTIGVDFDAVVDIAIVTKRTRIVDFTQPYIESGLVVVAVPVTCLNDTP  
WAFLRPF **PMWAVTAAFFLIVGSVIWILE**HRINDEFGRPPRQIVTILWFSFSTMFFSHRETTVSTLGRAVL **LIWLFVVLII**  
**SSYASLTS**LTVQQLNSPIRGVDTLISSSGRVGFQVGSYAENYMIDELNIARSRLVPLGSPKEYAAALQNGTVAAIVDERPYV  
DLFLSEFCG **FAIRGQEFTRSGWGFAFP**RDSPLAIDMSTAILGLSETGQLQKIHDKWLSRNSCNLNGSVSDEDSEQLKRSF  
**WGLFLVCGISCFIALFIYFK****IVRDFFRHGK**YDEEATVPSPESSRSKSLQTLFLAYFDEKEDESKRRMKRKRNDLTLKPSRPI

**GLR3.3 (last 347 AA)**

MKQLWTFFFLSFLCSGLFRRTHEKPKVVKIGSIFSDSVIGKVAKIAIDEAVKDVNSNPDILSGTKFSVSMQNSNCSGFMG  
MVEALRFMEKDIVGIIGPQCSVVAHMISHMANELRVPLLSFAVTDVPMSPQLQFPYFIRTTQSDLYQMDAIASIVDFYGWKE  
VIAVFDVDDFGRNGVAALNDKLSRRLRITYKAGLHPDTAVNKNEIMNMLIKIMLLQPRIVVIHVYSELGFVAFKEAKYLG  
MNGYVWIATDOWLSTNLDDSSPLPAERLETIQGVLVLRPHTPDSDFKREFFKRWRKMSGASLALNTYGLYAYDSVMILLAR  
GLDKFFKDGGNISFSNHSMLNLTGKSGNLNLEAMTVFDGGEALLKDILGTRMVGTLTGQLQFTPDRSRTRPAYDIINVAGT  
VRQIGYWSNHGSLTVLPELLYTKKPNMSTSPKLVHVIWPGETFTKPRGWVFSNNGKELKIGVPLRVSYKEFVSQIRGTEN  
MFKGFCIDVFTAAVNLLPYAVPVKFIYPYNGKENPSYTHMVEMITTGNFDGVVDVAIVTNRKIVDFTQPYAASGLVVVA  
PFKLNLSGAWAFLRPF **RLMWAVTGCCFLVGIWVWILE**HRTNDEFGRPPKRCVTLWFSFSTMFFAHRETTVSTL **GRLV**  
**LIWLFVVLIISSY**ASLTSILTVOQLSSPIKIESLRERDDPIGYQVGSFAESYLRNELNISESRLVPLGTPEAYAKALKDGP  
GVAIVDERPYVELFSSNCA **YRIVGQEFKSGWGFAFP**RDSPLAIDLSTAILAENGDLQRIHDKWLMKNACTLENAELES  
DRLHLKSF **WGLFLICGVA****CLALFLYVQ****IIRQLYKPTD**DAIARDQQNHSSMRSTRLQRFSLMDEKEESKHESKRRKI  
DGSMNDTSGSTRSRGFDRERSFNSVNPLD

**GLR3.4 (last 347 AA)**

MGFLVMIREVSMAKAIRVLLCVSVLWVVPKECACRSNFSRNSSSSSSSSLRPLRQRPSSVNVGALFTYDSFIGRAAKPAVK  
AAMDDVNADQSVLKGIKLNIIFQDSNCSGFIGTMGALQLMENKVVAAGPQSSGIAHMISYVANELHVPPLLSFGATDPTLS  
SLQFPYFLRRTQNDYFQMHAIAFDLSYSGWRQVIAIFVDDCEGRNGISVLGDVLAKKRSRISYKAAITPGADSSSIRDLLVSVN  
LMESRVFVHVNPDSGLNVFSVAKSLGMMASGYVWIATDWLPTAMDSEHVSDTMDLLQGVAFRHYTISSVVKRQ  
FMARWKNLRPNDFGNSYAMYAYDSVWLVARALDVFFRENNNITFSNDPNLHKTNGSTIQLSALSVFNEGEKFMKIIILGM  
NHTGVTGPIQFSDRNRVNPAYEVLNLEGTAPRTVGYWSNHGSLSVVHPETLYSRPPNTSTANQRKGIIPGEVTKPPRG  
WVFPNNGKPLRIGVNPVSYTDYVSKDKNPPGVRGYCIDVFEAAIPELLPYPVPRTYILYGDGKRNPSTYDNLVNEVVADNFD  
VAVGDITVTRTRYVDFTPQFIESGLVVVAPVKEAKSSPWSFLKPF **TIEMWAVTGGFFLVGAMVWILEHRFNQEFRGPP**  
**RRQLITWFVFSSTMFFS** HRENTVSSLGRFVL **IWLFVVLINSSYASLTS** LTIRQLTSRIEGIDSLVTSNEPIGVQDGTAFARNYLI  
NELNILPSRIVPLKDEEQYLSALQRGPNAGGVAIVDELPIYEVLLTNSNCK **KFRTVGQEFTRTGWGFAFQ** RDSPLAVDMSTAI  
LQLSEEGELEKIHKRWLNKYHECSMQISNSEDSQLSLKSF **WGLFLICGITCFMALTVEFW** VFWQYQRLLPESADEERAGEV  
SEPSRSGRGRAPSFKELIKVVDKREAEIKEILKQKSSKLLKSTQSAAGTSQSQHGEIT

**GLR3.5 (last 348 AA)**

MGALQLMENKVVAAGPQSSGIGHIISHVANELHVPFLSFAATDPTLSSSQYYPYFLRRTQNDYFQMNAITDFVSYFRWREV  
VAIFVDDDEYGRNGISVLGDALAKKRAKISYKAAFPAGADNSSISDLLASVNLMESRIFVHVNPDSGLNIFVAKSLGMMGS  
GYVWITTDWLLTALDSMEPLDPRALDLLQGVAFRHYTPESDNKRQFKGRWKNLRFKESLSDDGFNYSYALYAYDSVWL  
ARALDVFSQGNVTFSNDPSLRNTNDSGIKLSKLHIFNEGERFLQVILEMNYTGLTGQIEFNSEKNRINPAYDILNIKSTGPL  
RVGYWSNHTGFSVAPPETLYSKPSNTSAKDQRLNEIWPGEVIKPPRGWVFPENGKPLKIGVNPVRSYKNYASKDKNPLGV  
KGCIDIFEAAIQLLPYPVPRTYILYGDGKKNPSYDNLISEVAANIFDVAVGDVTIITNRKTFVDFTQPFIESGLVVVAPVKGAKS  
SPWSFLKPF **TIEMWAVTGALFLVGAIVI** LEHRFNEEFRGPPRRQIITVFWFSSTMFFSHRENTVSTLGRF **VLVWLVVLI**  
**IINSSYASLT** SILTVQQLTSRIEGMDTLIASNEPIGVQDGTFAWKFLVNELNIAPSRIIPLKDEEYLSALQRGPRGGGVAIVD  
ELPYIKALLSNSNCKFRTVGQEFTRTGWGFAFQ RDSPLAVDMSTAILQLAEEGKLEKIRKKWLTVDHECTMQISDTENYQIS  
VQ **SWGLFLICGVVWFIALTLFC** WKVFWQYQRLRPEESEDEVQARSEEAG **SSRGKSLRAVSFKDLIKVVDKREAEIKEMLKEK**  
SSKLLKDGQSSAENSQSKDHETPQ

**GLR3.6 (last 328 AA)**

MKWFLMLLIICNAVPLQGLTKIVSARPQVVNIGSVFTFNSLIGKVIKVAMDAAVEDVNASPSILNTTTLRIIMHDTKYNGFM  
SIMEPLQFMESETVAIIGPQRSTTARVVAHVATELKIPILSFSATDPTMSPLQFPFFIRTSQNDLFQMAAIADIVQFYGWREV  
VAIYGDYDGRNGVAALGDLSEKRCRISYKAAALPPAPTRENITDLLIKVALSESRIVVHAFIWFGLFNVARNLGMSTG  
YVWIATNWLSTIIDTDSPLPLDTINNIQGVITLRLHTPNSIMKQNFVQRWHNLTHVGLSTYALYAYDTVWLLAQAIIDFFKK  
GGNVFSKNIPISELGGNLHLDALKVFDGGKIFLESILQVDRIGLTGRMKFTSDRNLVNPFDVLNVIGTYTTIGYWFNHS  
GLSMPADEMENTSFSGQKLHSVWPGHSIKIPRGWVFSNNGRHLRIGVNPVNRFRFEVSVKSNGMITGFCVDVFIAAIN  
LLPYAVPFELVAFNGHDNPSNSELVRLITTVYDAGVGDITITERTKMADFTQPYVESGLVVVAPVRKLGSSAMAFLRPF **I**  
**PQMWLIAAASFLIVGAVIWC** LEHKHNDSEFRGPPRRQVITTFWFSSTLFFSHRETTSNL **GRIVLIWLVVLIINSSYASLTSI**  
LTVHQLSSPIKGIETLQTNHDPYGPQGSFVRDYLIHELNIHVSRLVPLRSPEEYDKALRDGPGKGGVAAVVDERAYIELFLSN  
RCEFGIVGQEFKNGWGFAPRNSPLAVDVSAAIQLSENGDM **QRIRDKWLLRKACSLQ** GAIEVDRLELKS **FWGLFVVC**  
**VACVLALAVYTV** LMIRQFGQCPPEAEGSIRRRSSPSARIHSFLSFVKEKEEDAKARSSRERQLEDISANGSSRCN

**GLR3.7 (last 344 AA)**

MGLGIDPSVAITALIVVILVPMDCRQPQLVNIGAVFAFDSVIGRAAKVALEAAVSDVNNDKSFLKETELRLLMDSACNVF  
RGSFGAFELLEKEVVAMIGPISSVAHTISDIAKGLHFPLVSAATDPTLSALQFPFLRTPNDAHQMSALVDLINFYGWKE



VISVYSDDELGRNGVSALDDELYKKRSRISYKVPLSVHSDEKFLTNALNKS SIGPRVYILHFGPDLLRIFDIAQKLQMMTHE  
YVWLATDWLSVTLDSLSDKGTLLRLEGVVGLRQHIPESVKMEHFTHKLQSNRSMNAYALHAYDTVWMI AHGIEELLNEGI  
NITFSYSEKLLHARGTKLHLEKIKFFNSGELLEKLLKVNFTGIAGQQFGSGRNVIGCDYEIINVNKT DVHTVGFWSKNGGFS  
VVAPKTRHSQKTSFVSDKLGDITWPGGGREKPRGWVIADSDPLKIVVPRRVSFVEFVTEEKNSSHRIQGFCIDVFIEALK  
FVPYSVPYIFEPFGNGHSSPNYNHLIQMVT DGVYDAAVGDIAIVPSRSLVDFSQPYASTGLVVIPANDDNATWIFLRPFTS  
RLWCVVLVSLVIAVVIWI LEHRINEDFRGPPRRQLSTMLLFSFSTLFKRNQEDTISN LARLMIVWLFLLMVL TASYTANLTS  
ILTVQQLPSAITGIDSLRASEVPIGYQAGTFTLE YLTYSLGMARSRLVPLDSTEYEKALKLGPTNWGGVAAIVDELPIELFLAE  
RTGFKIVGEPFMHRGWGF AFKRDSPLAIDMSTAILKSE TRKLQEIRKKWL CKTN CAGKSNWNPEPNQLHLKSFKG LYLVC  
AITVSAFLVYLRLM RQFVRYRRME RTSSMPRASWSASPTLRLREL VDFVDFVDEKEEAIKRMFRRSDDSNNNPSHVGEV  
QADTEVPRN

## Supplemental Figure 2

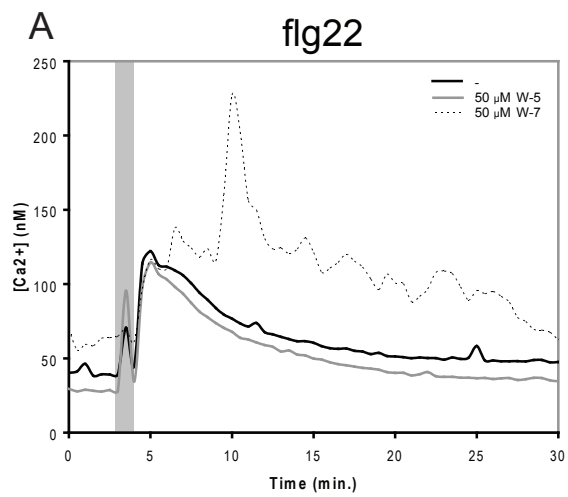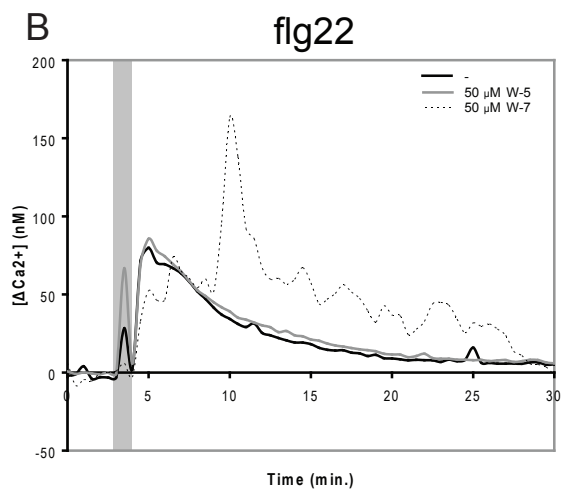

**Supplemental Figure 1. Transmembrane and CaMBD predictions for individual Arabidopsis iGluRs.**

**Supplementary Figure 2. Individual seedling response curves upon treatment with the calmodulin antagonist W-7.**
